# Supplementary material for: The VA Life‐Sustaining Treatment Decisions Initiative: A qualitative analysis of veterans with advanced kidney disease
Source: PubMed Central journal article supplement — J Am Geriatr Soc. 2022 Apr 18;70(9):2517–29. doi: 10.1111/jgs.17807 (PMC9790645; doi:10.1111/jgs.17807), 2022-04-18
Supplement: JGS-70-2517-s001.pdf [file JGS-70-2517-s001.pdf]

| <b>Supplemental Table 1. Fields in the LST template note</b>                                                                                                                                                                                      |                                                                                                                                                                                                                                                                                                                                                                                                                                                                                                                                                                                                                                                                                                                            |
|---------------------------------------------------------------------------------------------------------------------------------------------------------------------------------------------------------------------------------------------------|----------------------------------------------------------------------------------------------------------------------------------------------------------------------------------------------------------------------------------------------------------------------------------------------------------------------------------------------------------------------------------------------------------------------------------------------------------------------------------------------------------------------------------------------------------------------------------------------------------------------------------------------------------------------------------------------------------------------------|
| <b>Items</b>                                                                                                                                                                                                                                      | <b>Pre-specified options</b>                                                                                                                                                                                                                                                                                                                                                                                                                                                                                                                                                                                                                                                                                               |
| *1. Does the patient have capacity to make decisions about life-sustaining treatments?                                                                                                                                                            | <ul style="list-style-type: none"> <li>• The patient has capacity to make decisions about life-sustaining treatments</li> <li>• The patient lacks capacity to make decisions about life-sustaining treatments and has a surrogate.</li> <li>• The patient lacks capacity to make decisions about life-sustaining treatments and has no surrogate.</li> </ul>                                                                                                                                                                                                                                                                                                                                                               |
| 2. Who is the person authorized under VA policy to make decisions for the patient if/when the patient loses decision- making capacity?                                                                                                            | <ul style="list-style-type: none"> <li>• Authorized surrogate if/when the patient loses decision-making capacity: [text box]</li> <li>• The patient has no surrogate authorized to make health care decisions if/when the patient loses decision-making capacity.</li> </ul>                                                                                                                                                                                                                                                                                                                                                                                                                                               |
| 3. Have you reviewed available documents that reflect the patient’s wishes regarding life- sustaining treatments? Examples: advance directives, state-authorized portable orders (e.g., POLST, MOST), life-sustaining treatment templates/orders. | <ul style="list-style-type: none"> <li>• No advance directive, state-authorized portable orders, or life – sustaining treatment templates/orders were available in the record or presented by the patient (or surrogate) [optional text box]</li> <li>• I reviewed with the patient (or surrogate) all active advance directives (s), state-authorized portable orders, or life-sustaining treatment templates/orders available in the record and/or presented by the patient (or surrogate)</li> </ul>                                                                                                                                                                                                                    |
| 4. Does the patient (or surrogate) have sufficient understanding of the patient’s medical condition to make informed decisions about life-sustaining treatments?                                                                                  | <ul style="list-style-type: none"> <li>• Yes. The patient’s (or surrogate’s) understanding is consistent with the medical facts.</li> <li>• Other (e.g., the patient lacks decision-making capacity and has no surrogate) [text box]</li> </ul>                                                                                                                                                                                                                                                                                                                                                                                                                                                                            |
| *5. What are the patient’s goals of care? (Select all that apply)                                                                                                                                                                                 | <p>Patient’s goals of care in their own words, or as stated by the surrogate:</p> <ul style="list-style-type: none"> <li>• To be cured of [text box]</li> <li>• To prolong life</li> <li>• To improve or maintain function, independence, quality of life</li> <li>• To be comfortable</li> <li>• To obtain support for family/caregiver</li> <li>• To achieve life goals, including:</li> </ul>                                                                                                                                                                                                                                                                                                                           |
| 6. What is the current plan for use of life-sustaining treatments?                                                                                                                                                                                | <ul style="list-style-type: none"> <li>• FULL SCOPE OF TREATMENT in circumstances OTHER than cardiopulmonary arrest.</li> <li>• LIMIT LIFE-SUSTAINING TREATMENT, as follows: <ul style="list-style-type: none"> <li><i>Artificial Nutrition</i> <ul style="list-style-type: none"> <li>• No artificial nutrition (enteral or parenteral)</li> <li>• Limit artificial nutrition as follows: [text box]</li> </ul> </li> <li><i>Artificial Hydration</i> <ul style="list-style-type: none"> <li>• No artificial hydration (enteral, IV, or subcutaneous) except if needed for comfort</li> <li>• Limit artificial hydration as follows: [text box]</li> </ul> </li> <li><i>Mechanical Ventilation</i></li> </ul> </li> </ul> |

|                                                                                                 |                                                                                                                                                                                                                                                                                                                                                                                                                                                                                                                                                                                                                                                                                                                                                                                                                                                                                                                                                                                                                                                                |
|-------------------------------------------------------------------------------------------------|----------------------------------------------------------------------------------------------------------------------------------------------------------------------------------------------------------------------------------------------------------------------------------------------------------------------------------------------------------------------------------------------------------------------------------------------------------------------------------------------------------------------------------------------------------------------------------------------------------------------------------------------------------------------------------------------------------------------------------------------------------------------------------------------------------------------------------------------------------------------------------------------------------------------------------------------------------------------------------------------------------------------------------------------------------------|
|                                                                                                 | <ul style="list-style-type: none"> <li>• No invasive mechanical ventilation (e.g., endotracheal or tracheostomy tube)</li> <li>• No non-invasive mechanical ventilation (e.g., CPAP, BiPAP)</li> <li>• Limit mechanical ventilation as follows: [text box]</li> </ul> <p><i>Transfers between Levels of Care</i></p> <ul style="list-style-type: none"> <li>• No transfers to the ICU except if needed for comfort</li> <li>o No transfers to the hospital except if needed for comfort</li> <li>• Limit transfers as follows (e.g. patient wishes to remain at home if possible): [text box]</li> </ul> <p><i>Limit Other Life-Sustaining Treatment as follows (e.g., blood products, dialysis): [text box]</i></p> <ul style="list-style-type: none"> <li>• NO LIFE-SUSTAINING TREATMENT in circumstances OTHER than cardiopulmonary arrest.</li> <li>• *CARDIOPULMONARY RESUSCITATION (CPR) Full Code:<br/>Attempt CPR<br/>DNAR/DNR: Do not attempt CPR<br/>DNAR/DNR with exception: ONLY attempt CPR during the following procedure: [text box]</li> </ul> |
| 7. Who participated in this discussion?                                                         | <ul style="list-style-type: none"> <li>• Document participants and other relevant information: [text box]</li> </ul>                                                                                                                                                                                                                                                                                                                                                                                                                                                                                                                                                                                                                                                                                                                                                                                                                                                                                                                                           |
| *8. Who has given oral informed consent for the life- sustaining treatment plan outlined above? | <ul style="list-style-type: none"> <li>• The patient has given oral informed consent for the life-sustaining treatment plan.<br/>The surrogate has given oral informed consent for the life-sustaining treatment plan. Name of the surrogate providing consent:</li> <li>• The patient lacks decision-making capacity and has no surrogate.</li> <li>• The LST plan has been approved through the</li> <li>• multidisciplinary committee review process.</li> </ul>                                                                                                                                                                                                                                                                                                                                                                                                                                                                                                                                                                                            |
| *Items are required                                                                             |                                                                                                                                                                                                                                                                                                                                                                                                                                                                                                                                                                                                                                                                                                                                                                                                                                                                                                                                                                                                                                                                |

| <b>Supplemental Table 2. Query note titles and terms</b>     |                         |
|--------------------------------------------------------------|-------------------------|
| <b>Note titles</b>                                           | <b>Terms</b>            |
| Life-sustaining Treatment Plan                               | life-sustaining         |
| Goals & Preferences to Inform Life-sustaining Treatment Plan | LST                     |
| Nephrology                                                   | withhold                |
| Palliative Care                                              | goals of care           |
| Pastoral Care                                                | goc                     |
| Social Work                                                  | goals of treatment      |
| Discharge Summary                                            | treatment goals         |
| History & Physical                                           | family meeting          |
| Death                                                        | family discussions      |
| Geriatric                                                    | patient goals           |
| Geriatric and Extended Care                                  | DPOA                    |
| Ethics                                                       | MPOA                    |
| Advance Directive                                            | healthcare proxy        |
|                                                              | advance directive       |
|                                                              | surrogate               |
|                                                              | power of attorney       |
|                                                              | quality of life         |
|                                                              | QOL                     |
|                                                              | futile                  |
|                                                              | prognosis               |
|                                                              | dialysis                |
|                                                              | hospice                 |
|                                                              | comfort measures        |
|                                                              | comfort care            |
|                                                              | cmo                     |
|                                                              | palliative care         |
|                                                              | die                     |
|                                                              | wishes to be full code  |
|                                                              | remains full code       |
|                                                              | wants CPR               |
|                                                              | life expectancy         |
|                                                              | full code despite       |
|                                                              | long discussion         |
|                                                              | aggressive intervention |
|                                                              | aggressive care         |
|                                                              | reverse code status     |
|                                                              | guardianship            |

big picture  
life-prolong  
natural death  
suffering  
end of life

| <b>Supplemental Table 3. Patient characteristics at time of first LST note</b>              |            |
|---------------------------------------------------------------------------------------------|------------|
|                                                                                             | n (%)      |
|                                                                                             | N=500      |
| Mean age, years (SD)                                                                        | 72 (11)    |
| Male                                                                                        | 487 (97.4) |
| Race                                                                                        |            |
| White                                                                                       | 295 (59.0) |
| Black                                                                                       | 168 (33.6) |
| Other                                                                                       | 37 (7.4)   |
| Hispanic                                                                                    | 40 (8.0)   |
| Income, USD/year                                                                            |            |
| <12000                                                                                      | 116 (23.2) |
| 12000-20000                                                                                 | 85 (17.0)  |
| 20000-35000                                                                                 | 116 (23.2) |
| >35000                                                                                      | 183 (36.6) |
| Residence                                                                                   |            |
| Urban                                                                                       | 370 (74.0) |
| Rural                                                                                       | 125 (25.0) |
| Highly rural                                                                                | 5 (1.0)    |
| Marital status                                                                              |            |
| Married                                                                                     | 219 (43.8) |
| Single, divorced or widowed                                                                 | 279 (55.8) |
| Unknown                                                                                     | 2 (0.4)    |
| CAN score >95th percentile                                                                  |            |
| 1-year mortality                                                                            | 267 (53.4) |
| 90-day mortality                                                                            | 265 (53.0) |
| 1-year hospitalization                                                                      | 265 (53.0) |
| 90-day hospitalization                                                                      | 273 (54.6) |
| Comorbidities                                                                               |            |
| End-stage liver disease                                                                     | 90 (18.0)  |
| Cancer                                                                                      | 149 (29.8) |
| Cardiovascular disease                                                                      | 339 (67.8) |
| Dementia                                                                                    | 77 (15.4)  |
| Any palliative care consultation in prior 1 year                                            | 69 (13.8)  |
| Any emergency room visits in prior 1 year                                                   | 393 (78.6) |
| Any hospitalization in prior 30 days                                                        | 82 (16.4)  |
| Abbreviations: LST, Life-Sustaining Treatments; CAN, Care Assessment Needs; USD, US dollars |            |

**Supplemental Table 4. Characteristics of first LST note**

|                                                                   | n (%)      |
|-------------------------------------------------------------------|------------|
|                                                                   | N=500      |
| Setting and services in which note completed                      |            |
| Outpatient                                                        | 208 (41.6) |
| Primary care                                                      | 42 (8.4)   |
| Renal                                                             | 20 (4.0)   |
| Hospice or Palliative care                                        | 29 (5.8)   |
| Home-based Primary Care                                           | 25 (5.0)   |
| Emergency Department                                              | 49 (9.8)   |
| Other outpatient                                                  | 43 (8.6)   |
| Inpatient                                                         | 292 (58.4) |
| Location                                                          |            |
| Hospice                                                           | 2 (0.4)    |
| Intensive care unit                                               | 41 (8.2)   |
| Nursing facility                                                  | 26 (5.2)   |
| Wards                                                             | 223 (44.6) |
| Primary service                                                   |            |
| General medicine                                                  | 210 (42.0) |
| General surgery                                                   | 17 (3.4)   |
| Other                                                             | 65 (13.0)  |
| Who provided consent to complete note                             |            |
| Patient                                                           | 399 (79.8) |
| Surrogate                                                         | 78 (15.6)  |
| Other                                                             | 23 (4.6)   |
| Patient lacked decision capacity at time note completed           | 81 (16.2)  |
| Patient's goals of care as indicated <sup>a</sup>                 |            |
| To be cured                                                       | 25 (5.0)   |
| To prolong life                                                   | 156 (33.2) |
| To improve or maintain function, independence and quality of life | 280 (56.0) |
| To be comfortable                                                 | 212 (42.4) |
| To obtain support for family/caregiver                            | 37 (7.4)   |
| Other                                                             | 112 (22.4) |
| Code status as indicated                                          |            |
| Full                                                              | 255 (53.0) |
| No artificial nutrition                                           | 5 (1.7)    |
| No artificial hydration                                           | 2 (0.7)    |
| No mechanical ventilation                                         | 22 (7.5)   |
| No non-invasive ventilation                                       | 0          |
| Limit other therapies                                             | 12 (4.1)   |

|                                                                         |            |
|-------------------------------------------------------------------------|------------|
| Limit transfer to ICU                                                   | 2 (0.7)    |
| Limit transfer to hospital                                              | 3 (1.0)    |
| DNR                                                                     | 220 (44.0) |
| DNR with exception <sup>b</sup>                                         | 15 (3.0)   |
| Abbreviations: LST, Life-Sustaining Treatments; DNR, Do Not Resuscitate |            |
| a patients may indicate more than one goal                              |            |
| b when DNR status is temporarily ceased during a procedure              |            |
